# Supplementary material for: Productive Performance and Cecum Microbiota Analysis of Broiler Chickens Supplemented with β-Mannanases and Bacteriophages—A Pilot Study
Source: MDPI journal article supplement (doi:10.3390/ani12020169), 2022-01-11
Supplement: s1 [file s1]

**Table S1.** Main bacterial abundance at Phylum level of the cecal content of broilers fed with CON, MN, BP, and MN + BP.

| Phylum          | CON   | Groups               |       |       | SEM  | P-value |
|-----------------|-------|----------------------|-------|-------|------|---------|
|                 |       | MN                   | BP    | MN+BP |      |         |
|                 |       | Relative abundance % |       |       |      |         |
| Euryarchaeota   | 0.03  | 0.47                 | 1.24  | 0.02  | 0.30 | 0.85    |
| Unassigned      | 0.04  | 0.03                 | 0.11  | 0.04  | 0.02 | 0.88    |
| Actinobacteria  | 7.74  | 8.15                 | 2.49  | 7.29  | 2.06 | 0.94    |
| Bacteroidetes   | 10.06 | 8.55                 | 8.29  | 12.29 | 1.88 | 0.96    |
| Cyanobacteria   | 1.73  | 0.75                 | 1.15  | 0.90  | 0.26 | 0.86    |
| Deferribacteres | 0.13  | 0.06                 | 0.00  | 0.09  | 0.04 | 0.80    |
| Firmicutes      | 71.67 | 67.10                | 79.43 | 76.90 | 2.98 | 0.58    |
| Proteobacteria  | 6.97  | 14.53                | 7.12  | 2.16  | 2.00 | 0.06    |
| Tenericutes     | 1.62  | 0.34                 | 0.18  | 0.30  | 0.32 | 0.79    |
| Verrucomicrobia | 0.01  | 0.01                 | 0.00  | 0.00  | 0.00 | 0.59    |

CON: Corn-soy meal + 10 ppm antibiotic growth promoter (Enramycine, Enradin® F80), MN: as CON + 500 ppm  $\beta$ -mannanases, BP: corn-soy meal + 500 ppm of Bacteriophage Cocktail, MN + BP: as BP + 500 ppm  $\beta$ -mannanases + 500 ppm of Bacteriophage Cocktail. SEM: Standard Error of the Mean

**Table S2.** Main bacterial abundance at Family level of the cecal content of broilers fed with CON, MN, BP, and MN + BP.

| Phylum          | Family              | CON   | Groups               |       |       | SEM  | P-value |
|-----------------|---------------------|-------|----------------------|-------|-------|------|---------|
|                 |                     |       | MN                   | BP    | MN+BP |      |         |
|                 |                     |       | Relative abundance % |       |       |      |         |
| Euryarchaeota   | Methanobacteriaceae | 0.00  | 0.37                 | 1.25  | 0.00  | 0.30 | 0.58    |
|                 | Unassigned          | 0.04  | 0.03                 | 0.11  | 0.04  | 0.02 | 0.88    |
| Actinobacteria  | Corynebacteriaceae  | 0.19  | 0.03                 | 0.03  | 0.02  | 0.04 | 0.78    |
|                 | Dermabacteraceae    | 0.26  | 0.03                 | 0.01  | 0.01  | 0.06 | 0.40    |
|                 | Bifidobacteriaceae  | 6.94  | 7.90                 | 2.15  | 7.03  | 2.06 | 0.99    |
|                 | Coriobacteriaceae   | 0.33  | 0.22                 | 0.31  | 0.24  | 0.03 | 0.76    |
| Bacteroidetes   | Bacteroidaceae      | 0.38  | 0.28                 | 0.96  | 2.36  | 0.40 | 0.82    |
|                 | Porphyromonadaceae  | 0.05  | 0.50                 | 0.95  | 0.01  | 0.19 | 0.90    |
|                 | Rikenellaceae       | 8.48  | 6.92                 | 5.33  | 9.57  | 1.55 | 0.90    |
|                 | S24-7               | 0.58  | 0.17                 | 0.54  | 0.15  | 0.13 | 0.87    |
|                 | [Barnesiellaceae]   | 0.32  | 0.53                 | 0.31  | 0.09  | 0.11 | 0.59    |
|                 | [Odoribacteraceae]  | 0.28  | 0.19                 | 0.23  | 0.13  | 0.04 | 0.86    |
| Cyanobacteria   | YS2;f_NA            | 1.74  | 0.75                 | 1.16  | 0.90  | 0.26 | 0.86    |
| Deferribacteres | Deferribacteraceae  | 0.13  | 0.06                 | 0.00  | 0.09  | 0.04 | 0.80    |
|                 | Bacillaceae         | 0.75  | 0.07                 | 0.63  | 0.22  | 0.21 | 0.43    |
|                 | Staphylococcaceae   | 0.26  | 0.09                 | 0.05  | 0.07  | 0.04 | 0.38    |
|                 | Enterococcaceae     | 0.08  | 0.09                 | 0.14  | 0.05  | 0.03 | 0.80    |
|                 | Lactobacillaceae    | 2.25  | 1.33                 | 4.36  | 1.45  | 0.46 | 0.43    |
|                 | Streptococcaceae    | 0.07  | 0.06                 | 0.36  | 0.21  | 0.06 | 0.68    |
|                 | Clostridiales;f_NA  | 7.32  | 4.54                 | 5.43  | 4.85  | 0.45 | 0.33    |
|                 | Christensenellaceae | 0.09  | 0.07                 | 0.11  | 0.13  | 0.02 | 0.93    |
|                 | Clostridiaceae      | 0.04  | 0.05                 | 0.11  | 0.09  | 0.01 | 0.33    |
|                 | Dehalobacteriaceae  | 0.05  | 0.04                 | 0.06  | 0.09  | 0.01 | 0.34    |
|                 | Lachnospiraceae     | 21.34 | 18.20                | 23.62 | 20.47 | 1.65 | 0.73    |
|                 |                     |       |                      |       |       |      |         |
|                 |                     |       |                      |       |       |      |         |
|                 |                     |       |                      |       |       |      |         |

|                |                       |       |       |       |       |      |      |
|----------------|-----------------------|-------|-------|-------|-------|------|------|
|                | Peptostreptococcaceae | 0.38  | 0.16  | 0.43  | 0.29  | 0.08 | 0.66 |
|                | Ruminococcaceae       | 34.33 | 31.08 | 37.89 | 40.76 | 3.16 | 0.73 |
|                | Veillonellaceae       | 3.53  | 10.55 | 5.38  | 7.28  | 2.12 | 0.80 |
|                | [Mogibacteriaceae]    | 0.19  | 0.12  | 0.12  | 0.14  | 0.02 | 0.36 |
|                | Erysipelotrichaceae   | 1.02  | 0.77  | 0.82  | 0.82  | 0.10 | 0.84 |
| Proteobacteria | Alcaligenaceae        | 0.42  | 0.44  | 0.31  | 0.09  | 0.09 | 0.59 |
|                | Desulfovibrionaceae   | 0.34  | 0.20  | 0.30  | 0.10  | 0.05 | 0.30 |
|                | Campylobacteraceae    | 0.11  | 0.07  | 0.07  | 0.05  | 0.02 | 0.30 |
|                | Helicobacteraceae     | 2.60  | 3.97  | 1.74  | 0.62  | 0.79 | 0.79 |
|                | Enterobacteriaceae    | 3.49  | 9.77  | 4.60  | 1.28  | 1.91 | 0.40 |
| Tenericutes    | Anaeroplasmataceae    | 1.45  | 0.24  | 0.05  | 0.10  | 0.31 | 0.23 |
|                | RF39:f_NA             | 0.17  | 0.10  | 0.11  | 0.20  | 0.03 | 0.60 |

CON: Corn-soy meal + 10 ppm antibiotic growth promoter (Enramycine, Enradin® F80), MN: as CON + 500 ppm  $\beta$ -mannanases, BP: corn-soy meal + 500 ppm of Bacteriophage Cocktail, MN + BP: as BP + 500 ppm  $\beta$ -mannanases + 500 ppm of Bacteriophage Cocktail. SEM: Standard Error of the Mean

**Table S3.** Main bacterial abundance at Genus level of the cecal content of broilers fed with CON, MN, BP, and MN + BP.

| Phylum          | Genus                    | Groups               |      |      |         | SEM  | P-value |
|-----------------|--------------------------|----------------------|------|------|---------|------|---------|
|                 |                          | CON                  | MN   | BP   | MN + BP |      |         |
|                 |                          | Relative abundance % |      |      |         |      |         |
| Euryarchaeota   | Methanobrevibacter       | 0.00                 | 0.37 | 1.25 | 0.00    | 0.30 | 0.58    |
|                 | Unassigned               | 0.04                 | 0.03 | 0.11 | 0.04    | 0.02 | 0.88    |
| Actinobacteria  | Corynebacterium          | 0.19                 | 0.03 | 0.03 | 0.02    | 0.04 | 0.77    |
|                 | Brachybacterium          | 0.26                 | 0.03 | 0.01 | 0.01    | 0.06 | 0.07    |
|                 | Bifidobacterium          | 6.96                 | 7.91 | 2.15 | 7.04    | 2.06 | 0.99    |
|                 | Coriobacteriaceae;g_NA   | 0.25                 | 0.18 | 0.27 | 0.21    | 0.03 | 0.64    |
|                 |                          |                      |      |      |         |      |         |
| Bacteroidetes   | Bacteroides              | 0.38                 | 0.28 | 0.96 | 2.36    | 0.40 | 0.82    |
|                 | Parabacteroides          | 0.05                 | 0.50 | 0.95 | 0.01    | 0.19 | 0.90    |
|                 | Rikenellaceae;_NA        | 6.26                 | 5.54 | 2.87 | 9.01    | 1.52 | 0.87    |
|                 | AF12                     | 0.37                 | 0.44 | 0.18 | 0.03    | 0.08 | 0.45    |
|                 | Alistipes                | 0.16                 | 0.23 | 0.70 | 0.07    | 0.13 | 0.77    |
|                 | Rikenella                | 1.70                 | 0.72 | 1.60 | 0.46    | 0.40 | 0.55    |
|                 | S24-7;g_NA               | 0.58                 | 0.17 | 0.54 | 0.15    | 0.13 | 0.87    |
|                 | [Barnesiellaceae];g_NA   | 0.33                 | 0.53 | 0.31 | 0.09    | 0.11 | 0.59    |
|                 | Odoribacter              | 0.28                 | 0.19 | 0.23 | 0.13    | 0.04 | 0.86    |
| Cyanobacteria   | YS2;f_NA;g_NA            | 1.74                 | 0.75 | 1.16 | 0.90    | 0.26 | 0.86    |
| Deferribacteres | Mucispirillum            | 0.13                 | 0.06 | 0.00 | 0.09    | 0.04 | 0.80    |
| Firmicutes      | Bacillaceae;g_NA         | 0.74                 | 0.07 | 0.63 | 0.22    | 0.21 | 0.46    |
|                 | Staphylococcus           | 0.25                 | 0.09 | 0.05 | 0.07    | 0.04 | 0.33    |
|                 | Enterococcus             | 0.08                 | 0.09 | 0.14 | 0.05    | 0.03 | 0.87    |
|                 | Lactobacillus            | 2.25                 | 1.33 | 4.37 | 1.45    | 0.46 | 0.43    |
|                 | Streptococcus            | 0.07                 | 0.06 | 0.36 | 0.21    | 0.06 | 0.68    |
|                 | Clostridiales;f_NA;g_NA  | 7.33                 | 4.54 | 5.44 | 4.86    | 0.45 | 0.33    |
|                 | Christensenellaceae;g_NA | 0.09                 | 0.07 | 0.11 | 0.13    | 0.02 | 0.93    |
|                 | Clostridium              | 0.04                 | 0.03 | 0.11 | 0.08    | 0.01 | 0.09    |
|                 | Lachnospiraceae;g_NA     | 9.97                 | 6.15 | 8.49 | 8.96    | 1.10 | 0.16    |
|                 | Blautia                  | 2.59                 | 2.21 | 2.35 | 2.30    | 0.28 | 0.97    |
|                 | Clostridium              | 0.35                 | 0.42 | 0.48 | 0.76    | 0.10 | 0.73    |
|                 | Coprococcus              | 2.27                 | 2.17 | 3.34 | 1.50    | 0.36 | 0.56    |
|                 | Dorea                    | 1.75                 | 1.13 | 1.21 | 0.98    | 0.20 | 0.23    |

|                 |                            |       |       |       |       |      |      |
|-----------------|----------------------------|-------|-------|-------|-------|------|------|
|                 | [Ruminococcus]             | 4.44  | 6.14  | 7.76  | 6.00  | 0.80 | 0.54 |
|                 | Peptostreptococcaceae;g_NA | 0.38  | 0.16  | 0.43  | 0.29  | 0.08 | 0.66 |
|                 | Ruminococcaceae;g_NA       | 9.80  | 7.62  | 9.43  | 9.11  | 0.87 | 0.83 |
|                 | Anaerofilum                | 0.13  | 0.06  | 0.08  | 0.11  | 0.03 | 0.88 |
|                 | Anaerotruncus              | 0.31  | 0.17  | 0.17  | 0.12  | 0.06 | 0.82 |
|                 | Butyricicoccus             | 1.28  | 0.91  | 3.85  | 0.95  | 0.59 | 0.60 |
|                 | Faecalibacterium           | 11.14 | 12.31 | 11.42 | 22.32 | 2.29 | 0.58 |
|                 | Oscillospira               | 7.40  | 5.22  | 7.94  | 4.27  | 0.57 | 0.06 |
|                 | Ruminococcus               | 3.82  | 3.16  | 2.73  | 2.73  | 0.34 | 0.29 |
|                 | Subdoligranulum            | 0.49  | 1.66  | 2.30  | 1.20  | 0.51 | 0.54 |
|                 | Megamonas                  | 2.55  | 10.28 | 5.09  | 7.16  | 2.06 | 0.89 |
|                 | Phascolarctobacterium      | 0.98  | 0.29  | 0.30  | 0.14  | 0.18 | 0.63 |
|                 | [Mogibacteriaceae];g_NA    | 0.19  | 0.12  | 0.12  | 0.14  | 0.02 | 0.36 |
|                 | Clostridium                | 0.27  | 0.17  | 0.26  | 0.28  | 0.04 | 0.83 |
|                 | Coprobacillus              | 0.26  | 0.16  | 0.15  | 0.16  | 0.04 | 0.71 |
|                 | Erysipelotrichaceae;g_NA   | 0.50  | 0.43  | 0.41  | 0.38  | 0.06 | 0.62 |
| Proteobacteria  | Sutterella                 | 0.42  | 0.44  | 0.31  | 0.09  | 0.09 | 0.65 |
|                 | Desulfovibrionaceae;g_NA   | 0.08  | 0.07  | 0.10  | 0.01  | 0.02 | 0.10 |
|                 | Bilophila                  | 0.07  | 0.01  | 0.20  | 0.08  | 0.04 | 0.90 |
|                 | Desulfovibrio              | 0.18  | 0.09  | 0.00  | 0.00  | 0.04 | 0.12 |
|                 | Campylobacter              | 0.11  | 0.07  | 0.07  | 0.05  | 0.02 | 0.78 |
|                 | Helicobacter               | 2.60  | 3.98  | 1.74  | 0.62  | 0.79 | 0.79 |
|                 | Enterobacteriaceae;g_NA    | 3.50  | 9.79  | 4.61  | 1.29  | 1.92 | 0.40 |
| Tenericutes     | Anaeroplasma               | 1.45  | 0.24  | 0.05  | 0.10  | 0.31 | 0.23 |
|                 | RF39;f_NA;g_NA             | 0.17  | 0.10  | 0.11  | 0.20  | 0.03 | 0.60 |
| Verrucomicrobia | Akkermansia                | 0.01  | 0.01  | 0.00  | 0.00  | 0.00 | 0.59 |

CON: Corn-soy meal + 10 ppm antibiotic growth promoter (Enramycine, Enradin® F80), MN: as CON + 500 ppm β-mannanases, BP: corn-soy meal + 500 ppm of Bacteriophage Cocktail, MN + BP: as BP + 500 ppm β-mannanases + 500 ppm of Bacteriophage Cocktail. SEM: Standard Error of the Mean
